# Supplementary material
Source: PubMed Central journal article supplement (PMC8599006)
Supplement: glab149_suppl_supplementary_materials.pdf [file glab149_suppl_supplementary_materials.pdf]

Supplemental Table 1. Characteristics of the eligible Sister Study participants from the full cohort and the unweighted and weighted DNA methylation subsample

|                                                 | Sister study cohort <sup>1</sup><br>(n= 35,861) | Methylation subsample<br>(unweighted, n= 2,316) | Methylation subsample<br>(weighted, n= 2,316) |
|-------------------------------------------------|-------------------------------------------------|-------------------------------------------------|-----------------------------------------------|
| Age, yrs. (SD)                                  | 55.5 (9)                                        | 56.7 (9)                                        | 55.3 (9)                                      |
| Body mass index, kg/m <sup>2</sup> (SD)         | 27.2 (6)                                        | 27.3 (6)                                        | 27.1 (6)                                      |
| Waist-to-hip ratio, ratio (SD)                  | 0.80 (0.1)                                      | 0.81 (0.1)                                      | 0.80 (0.1)                                    |
| Current physical activity, METs/wk. (SD)        | 51.5 (31)                                       | 51.7 (32)                                       | 52.9 (32)                                     |
| Education, %                                    |                                                 |                                                 |                                               |
| High school degree/GED                          | 14                                              | 15                                              | 15                                            |
| Attended college                                | 61                                              | 59                                              | 60                                            |
| Advanced degree                                 | 25                                              | 27                                              | 25                                            |
| Smoking Status, %                               |                                                 |                                                 |                                               |
| Never                                           | 52                                              | 50                                              | 50                                            |
| Former                                          | 40                                              | 43                                              | 42                                            |
| Current                                         | 8                                               | 7                                               | 8                                             |
| Menopause status, %                             |                                                 |                                                 |                                               |
| Premenopausal                                   | 35                                              | 32                                              | 36                                            |
| Postmenopausal                                  | 65                                              | 68                                              | 64                                            |
| Ever drinkers, %                                | 97                                              | 97                                              | 97                                            |
| Current drinkers, %                             | 88                                              | 88                                              | 88                                            |
| Duration of alcohol use, yrs. (SE) <sup>2</sup> | 34 (11)                                         | 36 (11)                                         | 35 (11)                                       |
| Recent alcohol use, drinks/week (SD)            | 3.4 (5)                                         | 3.6 (5)                                         | 3.4 (5)                                       |
| Lifetime alcohol use, drinks/year drinking (SD) | 110 (142)                                       | 115 (137)                                       | 108 (124)                                     |

<sup>1</sup>Restricted to non-Hispanic White women who were not missing alcohol use or covariate information

<sup>2</sup>Among ever drinkers

Abbreviations: standard deviation, SD; metabolic equivalent tasks, METs; General education development, GED.

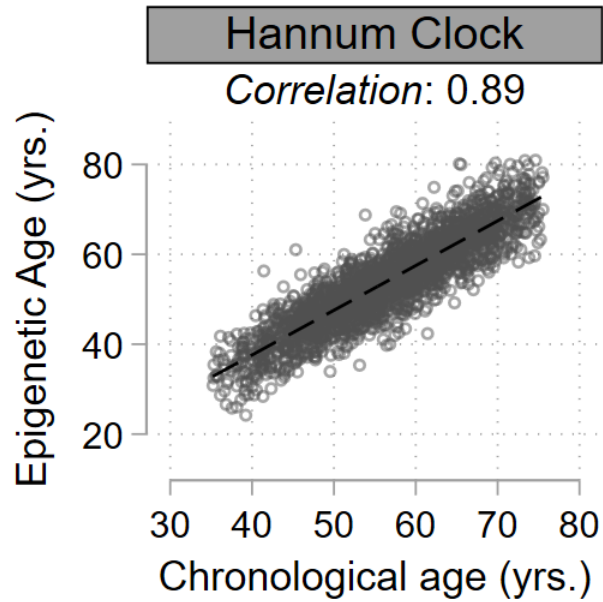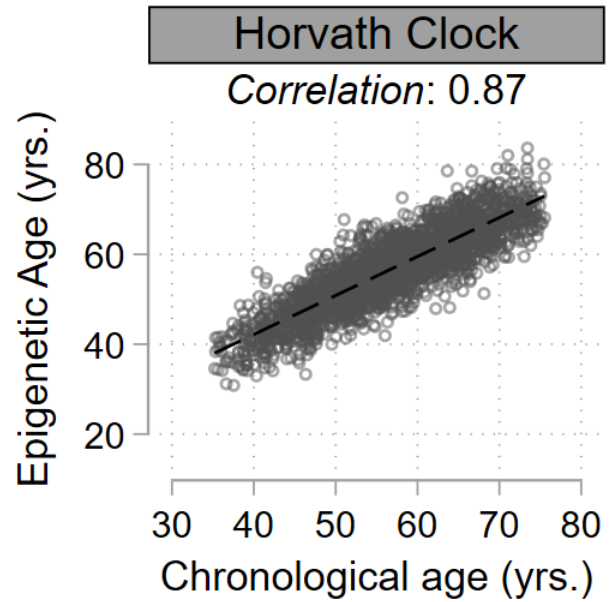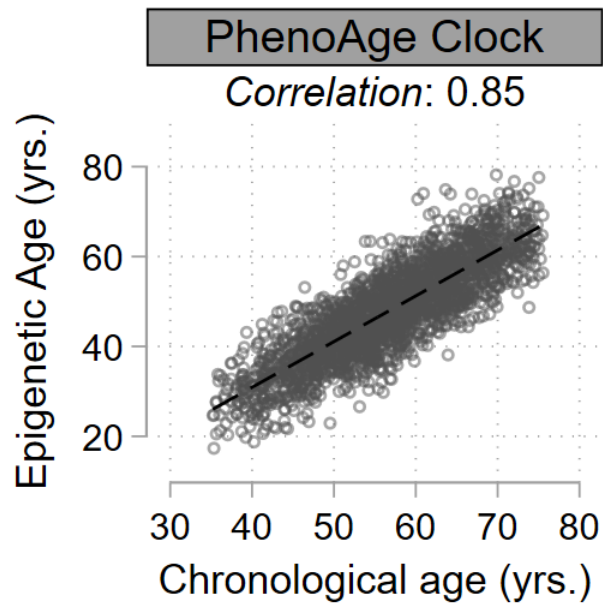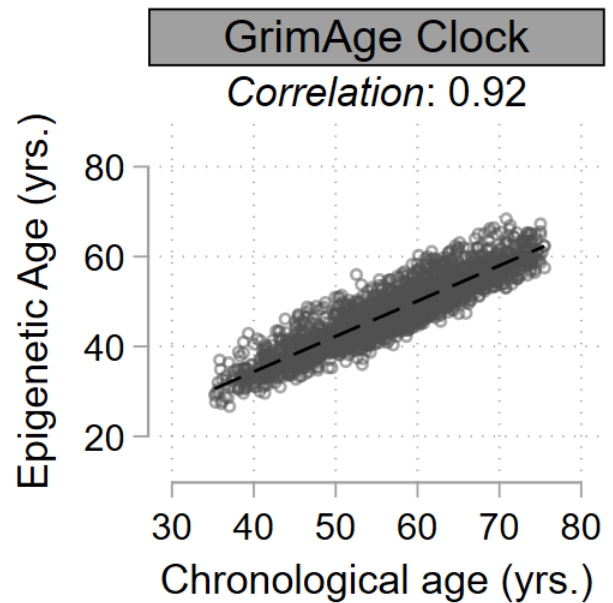

Supplemental Figure 1. *Survey weighted correlations of epigenetic age and chronological age.* For each of the four epigenetic clocks, scatterplots and Pearson correlation coefficients of predicted epigenetic age and chronological age.

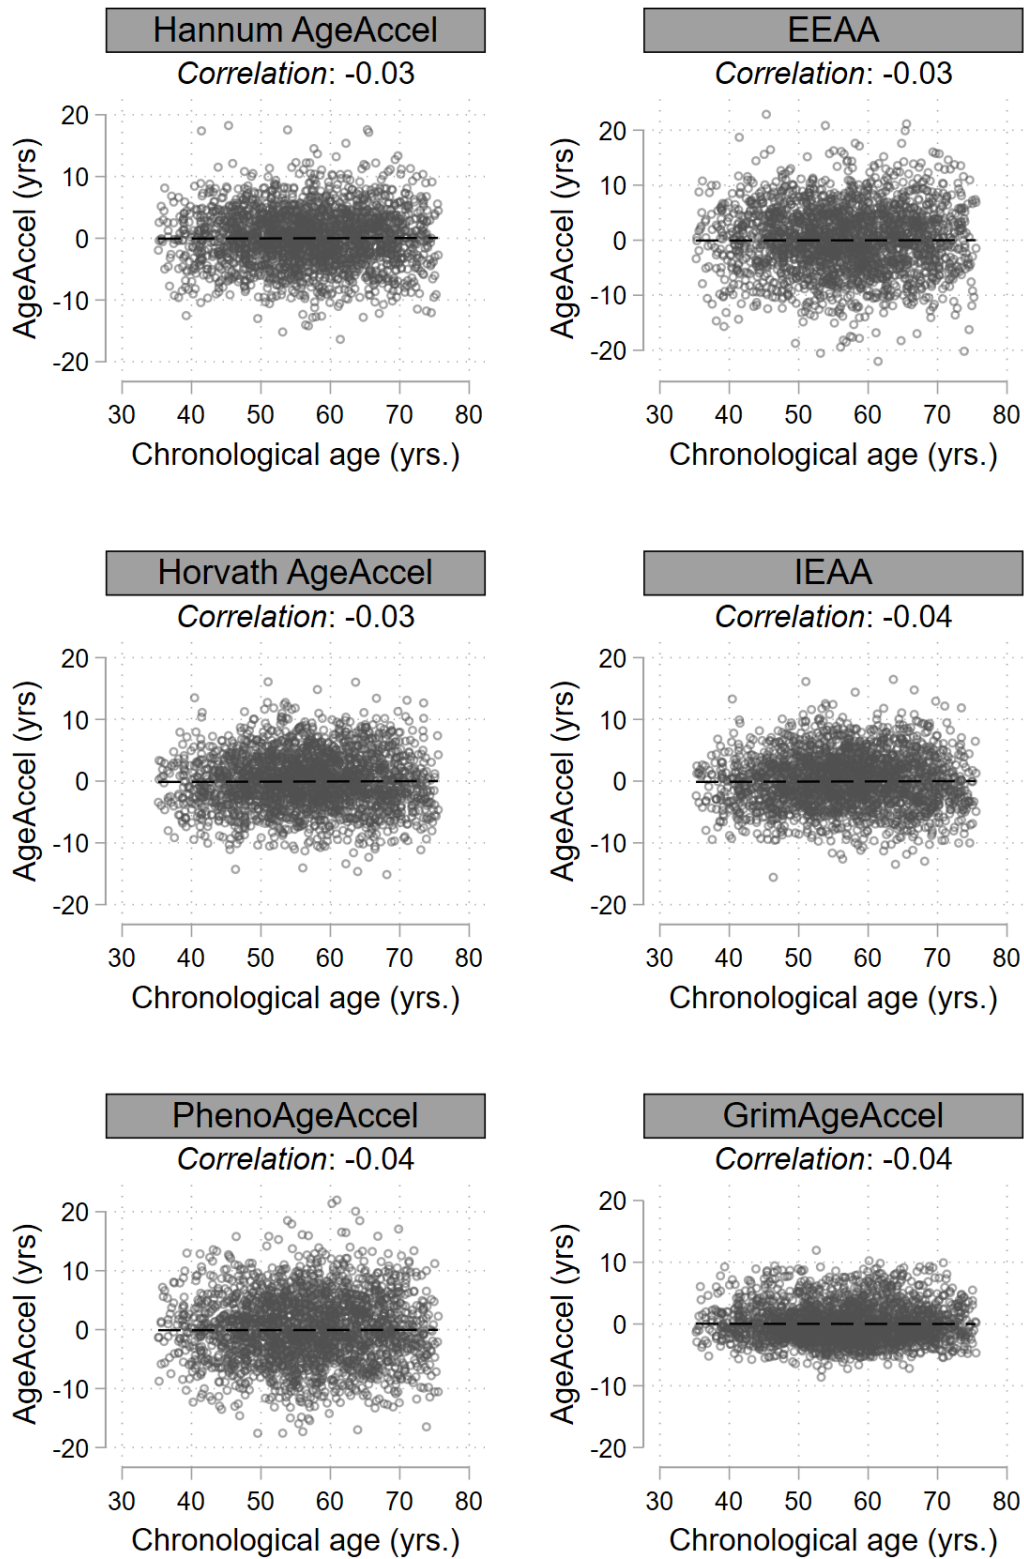

Supplemental Figure 2. Survey weighted correlations between epigenetic age acceleration metrics and chronological age. Scatterplots and Pearson correlation coefficients for the six metrics of epigenetic age acceleration and chronological age.

|                  | IEAA | Horvath AgeAccel | PhenoAgeAccel | Hannum AgeAccel | EEAA | GrimAgeAccel |
|------------------|------|------------------|---------------|-----------------|------|--------------|
| IEAA             | 1    | 0.96             | 0.44          | 0.39            | 0.32 | 0.06         |
| Horvath AgeAccel |      | 1                | 0.49          | 0.45            | 0.41 | 0.09         |
| PhenoAgeAccel    |      |                  | 1             | 0.45            | 0.48 | 0.44         |
| Hannum AgeAccel  |      |                  |               | 1               | 0.96 | 0.21         |
| EEAA             |      |                  |               |                 | 1    | 0.27         |
| GrimAgeAccel     |      |                  |               |                 |      | 1            |

Supplemental Figure 3. *Survey weighted correlations between the six epigenetic age acceleration metrics.* Pairwise Pearson correlations for the six epigenetic age acceleration metrics generated by the four epigenetic clocks.

Supplemental Table 2. Survey weighted crude alcohol consumption associations with the four epigenetic age acceleration metrics (N= 2,316)

|                                                     | Hannum AgeAccel    |      | Horvath AgeAccel    |      | PhenoAgeAccel       |      | GrimAgeAccel        |         |
|-----------------------------------------------------|--------------------|------|---------------------|------|---------------------|------|---------------------|---------|
|                                                     | $\beta$ (95% CI)   | P    | $\beta$ (95% CI)    | P    | $\beta$ (95% CI)    | P    | $\beta$ (95% CI)    | P       |
| <i>Separate alcohol consumption models</i>          |                    |      |                     |      |                     |      |                     |         |
| <b>Lifetime use</b>                                 |                    |      |                     |      |                     |      |                     |         |
| Per additional 135 drinks/yr.                       | 0.18 (-0.12, 0.49) | 0.24 | -0.23 (-0.51, 0.06) | 0.12 | 0.12 (-0.27, 0.51)  | 0.54 | 0.53 (0.31, 0.75)   | < 0.001 |
| <b>Recent use</b>                                   |                    |      |                     |      |                     |      |                     |         |
| Per additional 15 drinks/wk.                        | 0.13 (-0.17, 0.44) | 0.39 | -0.26 (-0.52, 0.01) | 0.06 | -0.11 (-0.47, 0.25) | 0.55 | 0.25 (0.05, 0.46)   | 0.02    |
| <i>Mutually adjusted alcohol consumption models</i> |                    |      |                     |      |                     |      |                     |         |
| <b>Lifetime use</b>                                 |                    |      |                     |      |                     |      |                     |         |
| Per additional 135 drinks/yr.                       | 0.16 (-0.20, 0.51) | 0.39 | -0.13 (-0.48, 0.22) | 0.45 | 0.24 (-0.23, 0.72)  | 0.32 | 0.55 (0.28, 0.82)   | < 0.001 |
| <b>Recent use</b>                                   |                    |      |                     |      |                     |      |                     |         |
| Per additional 15 drinks/wk.                        | 0.05 (-0.30, 0.40) | 0.78 | -0.18 (-0.51, 0.14) | 0.27 | -0.24 (-0.68, 0.20) | 0.28 | -0.04 (-0.30, 0.22) | 0.76    |
| All models are unadjusted                           |                    |      |                     |      |                     |      |                     |         |

Supplemental Table 3. Survey weighted alcohol consumption associations with the four epigenetic age acceleration metrics, stratified by menopause status at enrollment (N= 2,316)

|                                                     | Hannum AgeAccel     |      | Horvath AgeAccel     |      | PhenoAgeAccel       |      | GrimAgeAccel       |       |
|-----------------------------------------------------|---------------------|------|----------------------|------|---------------------|------|--------------------|-------|
|                                                     | $\beta$ (95% CI)    | P    | $\beta$ (95% CI)     | P    | $\beta$ (95% CI)    | P    | $\beta$ (95% CI)   | P     |
| <b>Premenopausal women</b>                          |                     |      |                      |      |                     |      |                    |       |
| <i>Separate alcohol consumption models</i>          |                     |      |                      |      |                     |      |                    |       |
| <b>Lifetime use</b>                                 |                     |      |                      |      |                     |      |                    |       |
| Per additional 135 drinks/yr.                       | 0.33 (-0.17, 0.83)  | 0.20 | 0.42 (-0.07, 0.91)   | 0.09 | 0.50 (-0.13, 1.14)  | 0.12 | 0.44 (0.13, 0.76)  | 0.006 |
| <b>Recent use</b>                                   |                     |      |                      |      |                     |      |                    |       |
| Per additional 15 drinks/wk.                        | 0.43 (-0.07, 0.93)  | 0.09 | 0.37 (-0.04, 0.78)   | 0.08 | 0.32 (-0.34, 0.99)  | 0.34 | 0.27 (-0.06, 0.60) | 0.11  |
| <i>Mutually adjusted alcohol consumption models</i> |                     |      |                      |      |                     |      |                    |       |
| <b>Lifetime use</b>                                 |                     |      |                      |      |                     |      |                    |       |
| Per additional 135 drinks/yr.                       | 0.10 (-0.47, 0.67)  | 0.72 | 0.29 (-0.32, 0.89)   | 0.35 | 0.45 (-0.26, 1.15)  | 0.22 | 0.41 (0.06, 0.75)  | 0.02  |
| <b>Recent use</b>                                   |                     |      |                      |      |                     |      |                    |       |
| Per additional 15 drinks/wk.                        | 0.38 (-0.19, 0.95)  | 0.19 | 0.22 (-0.28, 0.72)   | 0.38 | 0.10 (-0.63, 0.82)  | 0.79 | 0.07 (-0.28, 0.42) | 0.72  |
| <b>Postmenopausal women</b>                         |                     |      |                      |      |                     |      |                    |       |
| <i>Separate alcohol consumption models</i>          |                     |      |                      |      |                     |      |                    |       |
| <b>Lifetime use</b>                                 |                     |      |                      |      |                     |      |                    |       |
| Per additional 135 drinks/yr.                       | 0.22 (-0.15, 0.60)  | 0.25 | -0.40 (-0.74, -0.06) | 0.02 | 0.03 (-0.45, 0.52)  | 0.90 | 0.24 (0.01, 0.47)  | 0.04  |
| <b>Recent use</b>                                   |                     |      |                      |      |                     |      |                    |       |
| Per additional 15 drinks/wk.                        | 0.15 (-0.24, 0.54)  | 0.46 | -0.46 (-0.80, -0.12) | 0.01 | -0.12 (-0.55, 0.32) | 0.60 | 0.16 (-0.05, 0.37) | 0.13  |
| <i>Mutually adjusted alcohol consumption models</i> |                     |      |                      |      |                     |      |                    |       |
| <b>Lifetime use</b>                                 |                     |      |                      |      |                     |      |                    |       |
| Per additional 135 drinks/yr.                       | 0.20 (-0.23, 0.64)  | 0.36 | -0.25 (-0.66, 0.16)  | 0.23 | 0.11 (-0.47, 0.70)  | 0.71 | 0.22 (-0.07, 0.50) | 0.13  |
| <b>Recent use</b>                                   |                     |      |                      |      |                     |      |                    |       |
| Per additional 15 drinks/wk.                        | 0.049 (-0.41, 0.50) | 0.85 | -0.33 (-0.74, 0.08)  | 0.11 | -0.17 (-0.71, 0.36) | 0.52 | 0.05 (-0.22, 0.31) | 0.73  |

All models adjust for education level (High school/GED; attended college; advanced degree), body mass index (continuous, kg/m<sup>2</sup>), waist-to-hip ratio (continuous, ratio) smoking status (never, former, current), and physical activity (continuous, METs/wk.).

Supplemental Table 4. Survey weighted alcohol consumption quintile associations with the four epigenetic age acceleration metrics (N= 2,316)

|                                                     | Hannum AgeAccel     |      | Horvath AgeAccel     |      | PhenoAgeAccel       |      | GrimAgeAccel        |      |
|-----------------------------------------------------|---------------------|------|----------------------|------|---------------------|------|---------------------|------|
|                                                     | $\beta$ (95% CI)    | P    | $\beta$ (95% CI)     | P    | $\beta$ (95% CI)    | P    | $\beta$ (95% CI)    | P    |
| <i>Separate alcohol consumption models</i>          |                     |      |                      |      |                     |      |                     |      |
| <b>Lifetime use</b>                                 |                     |      |                      |      |                     |      |                     |      |
| Quintile 1 (mean: 6.9 drinks/yr.)                   | Ref.                |      | Ref.                 |      | Ref.                |      | Ref.                |      |
| Quintile 2 (mean: 31.6 drinks/yr.)                  | 0.57 (-0.24, 1.38)  | 0.17 | -0.05 (-0.89, 0.78)  | 0.90 | -0.14 (-1.11, 0.82) | 0.77 | 0.05 (-0.40, 0.50)  | 0.83 |
| Quintile 3 (mean: 71.9 drinks/yr.)                  | -0.14 (-1.02, 0.74) | 0.76 | -0.91 (-1.78, -0.04) | 0.04 | -0.74 (-1.76, 0.28) | 0.16 | 0.06 (-0.39, 0.52)  | 0.78 |
| Quintile 4 (mean: 137 drinks/yr.)                   | 0.86 (0.02, 1.69)   | 0.04 | -0.17 (-1.05, 0.70)  | 0.70 | -0.91 (-1.94, 0.11) | 0.08 | -0.08 (-0.55, 0.40) | 0.75 |
| Quintile 5 (mean: 327 drinks/yr.)                   | 0.90 (-0.01, 1.81)  | 0.05 | -0.63 (-1.53, 0.27)  | 0.17 | 0.01 (-1.11, 1.13)  | 0.99 | 0.63 (0.12, 1.13)   | 0.02 |
| <b>Recent use</b>                                   |                     |      |                      |      |                     |      |                     |      |
| Quintile 1 (mean: 0.03 drinks/wk.)                  | Ref.                |      | Ref.                 |      | Ref.                |      | Ref.                |      |
| Quintile 2 (mean: 0.51 drinks/wk.)                  | -0.28 (-1.08, 0.52) | 0.49 | -0.65 (-1.45, 0.15)  | 0.11 | -0.77 (-1.74, 0.21) | 0.12 | -0.19 (-0.64, 0.26) | 0.41 |
| Quintile 3 (mean: 1.95 drinks/wk.)                  | 0.71 (-1.05, 0.71)  | 0.71 | -0.95 (-1.75, -0.15) | 0.02 | -0.84 (-1.84, 0.17) | 0.10 | -0.26 (-0.72, 0.20) | 0.27 |
| Quintile 4 (mean: 4.70 drinks/wk.)                  | -0.04 (-0.94, 0.85) | 0.92 | -0.42 (-1.33, 0.48)  | 0.36 | -0.90 (-1.99, 0.18) | 0.10 | -0.38 (-0.86, 0.11) | 0.13 |
| Quintile 5 (mean: 11.7 drinks/wk.)                  | 0.32 (-0.58, 1.23)  | 0.48 | -0.90 (-1.78, -0.01) | 0.05 | -0.49 (-1.61, 0.62) | 0.39 | 0.16 (-0.35, 0.67)  | 0.53 |
| <i>Mutually adjusted alcohol consumption models</i> |                     |      |                      |      |                     |      |                     |      |
| <b>Lifetime use</b>                                 |                     |      |                      |      |                     |      |                     |      |
| Quintile 1 (mean: 6.9 drinks/yr.)                   | Ref.                |      | Ref.                 |      | Ref.                |      | Ref.                |      |
| Quintile 2 (mean: 31.6 drinks/yr.)                  | 0.68 (-0.15, 1.50)  | 0.11 | 0.19 (-0.66, 1.04)   | 0.66 | 0.09 (-0.91, 1.09)  | 0.87 | 0.17 (-0.31, 0.65)  | 0.49 |
| Quintile 3 (mean: 71.9 drinks/yr.)                  | -0.02 (-0.96, 0.92) | 0.96 | -0.68 (-1.61, 0.25)  | 0.15 | -0.50 (-1.61, 0.60) | 0.37 | 0.26 (-0.27, 0.79)  | 0.33 |
| Quintile 4 (mean: 137 drinks/yr.)                   | 0.95 (-0.01, 1.91)  | 0.05 | -0.01 (-0.96, 0.94)  | 0.99 | -0.75 (-1.92, 0.41) | 0.21 | 0.11 (-0.45, 0.67)  | 0.70 |
| Quintile 5 (mean: 327 drinks/yr.)                   | 0.93 (-0.13, 2.00)  | 0.09 | -0.43 (-1.49, 0.63)  | 0.43 | 0.07 (-1.29, 1.42)  | 0.93 | 0.72 (0.10, 1.34)   | 0.02 |
| <b>Recent use</b>                                   |                     |      |                      |      |                     |      |                     |      |
| Quintile 1 (mean: 0.03 drinks/wk.)                  | Ref.                |      | Ref.                 |      | Ref.                |      | Ref.                |      |
| Quintile 2 (mean: 0.51 drinks/wk.)                  | -0.33 (-1.15, 0.49) | 0.43 | -0.65 (-1.46, 0.17)  | 0.12 | -0.74 (-1.74, 0.27) | 0.15 | -0.20 (-0.66, 0.27) | 0.41 |
| Quintile 3 (mean: 1.95 drinks/wk.)                  | -0.27 (-1.18, 0.64) | 0.56 | -0.82 (-1.67, 0.02)  | 0.06 | -0.64 (-1.70, 0.43) | 0.24 | -0.31 (-0.83, 0.20) | 0.23 |
| Quintile 4 (mean: 4.70 drinks/wk.)                  | -0.30 (-1.30, 0.70) | 0.56 | -0.23 (-1.21, 0.76)  | 0.65 | -0.54 (-1.76, 0.68) | 0.39 | -0.48 (-1.04, 0.09) | 0.10 |
| Quintile 5 (mean: 11.7 drinks/wk.)                  | -0.16 (-1.21, 0.90) | 0.77 | -0.66 (-1.71, 0.38)  | 0.22 | -0.35 (-1.68, 0.98) | 0.61 | -0.15 (-0.77, 0.47) | 0.64 |

All models adjust for education level (High school/GED; attended college; advanced degree), body mass index (continuous, kg/m<sup>2</sup>), waist-to-hip ratio (continuous, ratio) smoking status (never, former, current), and physical activity (continuous, METs/wk.).

Supplemental Table 5. Survey weighted alcohol consumption associations with the two cell-type modified epigenetic age acceleration metrics (N= 2,316)

|                                                     | EEAA               |      | IEAA                |      |
|-----------------------------------------------------|--------------------|------|---------------------|------|
|                                                     | $\beta$ (95% CI)   | P    | $\beta$ (95% CI)    | P    |
| <i>Separate alcohol consumption models</i>          |                    |      |                     |      |
| <b>Lifetime use</b>                                 |                    |      |                     |      |
| Per additional 135 drinks/yr.                       | 0.22 (-0.19, 0.63) | 0.29 | -0.19 (-0.48, 0.09) | 0.18 |
| <b>Recent use</b>                                   |                    |      |                     |      |
| Per additional 15 drinks/wk.                        | 0.32 (-0.09, 0.73) | 0.13 | -0.20 (-0.45, 0.06) | 0.13 |
| <i>Mutually adjusted alcohol consumption models</i> |                    |      |                     |      |
| <b>Lifetime use</b>                                 |                    |      |                     |      |
| Per additional 135 drinks/yr.                       | 0.09 (-0.38, 0.56) | 0.72 | -0.13 (-0.47, 0.21) | 0.41 |
| <b>Recent use</b>                                   |                    |      |                     |      |
| Per additional 15 drinks/wk.                        | 0.27 (-0.20, 0.75) | 0.26 | -0.13 (-0.44, 0.18) | 0.41 |

All models adjust for education level (High school/GED; attended college; advanced degree), body mass index (continuous, kg/m<sup>2</sup>), waist-to-hip ratio (continuous, ratio) smoking status (never, former, current), and physical activity (continuous, METs/wk.).



Supplemental Table 6. Survey weighted alcohol consumption associations with the individual GrimAge clock components (N=2,316)

|                 | ADM                 |      | B2m                  |      | Cystatin C          |         | GDF15              |      |
|-----------------|---------------------|------|----------------------|------|---------------------|---------|--------------------|------|
|                 | $\beta$ (95% CI)    | P    | $\beta$ (95% CI)     | P    | $\beta$ (95% CI)    | P       | $\beta$ (95% CI)   | P    |
| Separate models |                     |      |                      |      |                     |         |                    |      |
| Lifetime use    | 0.51 (-0.66, 1.68)  | 0.39 | -68 (-9608, 9473)    | 0.99 | -1428 (-3560, 703)  | 0.19    | 3.50 (-3.82, 10.8) | 0.35 |
| Recent use      | 1.08 (-0.12, 2.29)  | 0.08 | -341 (-10072, 9388)  | 0.95 | -583 (-2664, 1499)  | 0.58    | 4.47 (-3.21, 12.2) | 0.25 |
| Combined model  |                     |      |                      |      |                     |         |                    |      |
| Lifetime use    | -0.04 (-1.42, 1.34) | 0.96 | 137 (-11309, 11583)  | 0.98 | -1526 (-4087, 1035) | 0.24    | 1.70 (-7.17, 10.6) | 0.71 |
| Recent use      | 1.10 (-0.28, 2.49)  | 0.12 | -412 (-12092, 11268) | 0.95 | 197 (-2313, 2706)   | 0.88    | 3.61 (-5.57, 12.8) | 0.44 |
|                 | Leptin              |      | Pack-years           |      | PAI-1               |         | TIMP-1             |      |
|                 | $\beta$ (95% CI)    | P    | $\beta$ (95% CI)     | P    | $\beta$ (95% CI)    | P       | $\beta$ (95% CI)   | P    |
| Separate models |                     |      |                      |      |                     |         |                    |      |
| Lifetime use    | -25.2 (-127, 76.6)  | 0.63 | 0.67 (0.19, 1.14)    | 0.01 | 248 (131, 367)      | < 0.001 | -25.8 (-110, 58.4) | 0.55 |
| Recent use      | -76.1 (-176, 23.6)  | 0.14 | 0.57 (0.11, 1.03)    | 0.02 | 211 (89.0, 333)     | 0.001   | 7.81 (-75.2, 90.8) | 0.85 |
| Combined model  |                     |      |                      |      |                     |         |                    |      |
| Lifetime use    | 17.0 (-95.3, 129)   | 0.77 | 0.51 (-0.04, 1.07)   | 0.07 | 192 (50.9, 333)     | 0.008   | -39.8 (-142, 62.9) | 0.45 |
| Recent use      | -84.8 (-199, 29.6)  | 0.15 | 0.31 (-0.23, 0.84)   | 0.26 | 113 (-30.6, 256)    | 0.12    | 28.1 (-72.5, 128)  | 0.58 |

All models adjust for education level (High school/GED; attended college; advanced degree), body mass index (continuous, kg/m<sup>2</sup>), waist-to-hip ratio (continuous, ratio) smoking status (never, former, current), and physical activity (continuous, METs/wk.).

<sup>1</sup>Combined models are mutually adjusted for both recent and lifetime alcohol use variables.

Supplemental Table 7. Survey weighted associations between additional alcohol consumption measures and the four epigenetic age acceleration metrics (N=2,316)

|                                              | Hannum AgeAccel     |      | Horvath AgeAccel    |      | PhenoAgeAccel       |      | GrimAgeAccel        |      |
|----------------------------------------------|---------------------|------|---------------------|------|---------------------|------|---------------------|------|
|                                              | $\beta$ (95% CI)    | P    |
| <i>Current drinking status</i>               |                     |      |                     |      |                     |      |                     |      |
| Never                                        | Ref.                |      | Ref.                |      | Ref.                |      | Ref.                |      |
| Former                                       | 0.69 (-0.83, 2.20)  | 0.37 | 1.63 (-0.10, 3.35)  | 0.06 | 1.92 (-0.29, 4.13)  | 0.09 | 1.05 (0.14, 1.97)   | 0.02 |
| Current                                      | 1.25 (0.00, 2.49)   | 0.05 | 0.66 (-0.90, 2.23)  | 0.41 | 1.18 (-0.75, 3.11)  | 0.23 | 0.62 (-0.16, 1.39)  | 0.12 |
| <i>Recent use intensity</i>                  |                     |      |                     |      |                     |      |                     |      |
| Per additional 1 drink/day on days drinking  | 0.26 (0.00, 0.51)   | 0.05 | -0.18 (-0.43, 0.07) | 0.15 | -0.07 (-0.45, 0.31) | 0.73 | 0.09 (-0.09, 0.27)  | 0.30 |
| <i>Lifetime number of binges<sup>1</sup></i> |                     |      |                     |      |                     |      |                     |      |
| None                                         | Ref.                |      | Ref.                |      | Ref.                |      | Ref.                |      |
| 1-25                                         | -0.29 (-1.03, 0.44) | 0.43 | 0.02 (-0.69, 0.72)  | 0.96 | -0.62 (-1.47, 0.22) | 0.15 | -0.01 (-0.39, 0.37) | 0.95 |
| 26-249                                       | 0.10 (-0.91, 1.10)  | 0.85 | 0.19 (-0.84, 1.22)  | 0.72 | -0.58 (-1.77, 0.61) | 0.34 | 0.15 (-0.46, 0.75)  | 0.64 |
| 250+                                         | -0.38 (-2.59, 1.83) | 0.74 | 1.93 (-0.18, 4.04)  | 0.07 | 1.70 (-1.09, 4.50)  | 0.23 | 0.36 (-0.89, 1.61)  | 0.57 |

<sup>1</sup>Excludes 308 women who never reported binge drinking but had lifetime averages greater than 60 drinks/year drinking. Referent group is women reporting fewer than 60 drinks/year drinking and never bingeing (low level drinkers).

All models adjust for average lifetime alcohol use, education level (High school/GED; attended college; advanced degree), body mass index (continuous, kg/m<sup>2</sup>), waist-to-hip ratio (continuous, ratio) smoking status (never, former, current), and physical activity (continuous, METs/wk.).
